# Supplementary material for: UTX coordinates TCF1 and STAT3 to control progenitor CD8+ T cell fate in autoimmune diabetes
Source: JCI journal article supplement (doi:10.1172/jci196325), 2025-12-16
Supplement: sd1 [file 1]

## Supplemental Figures

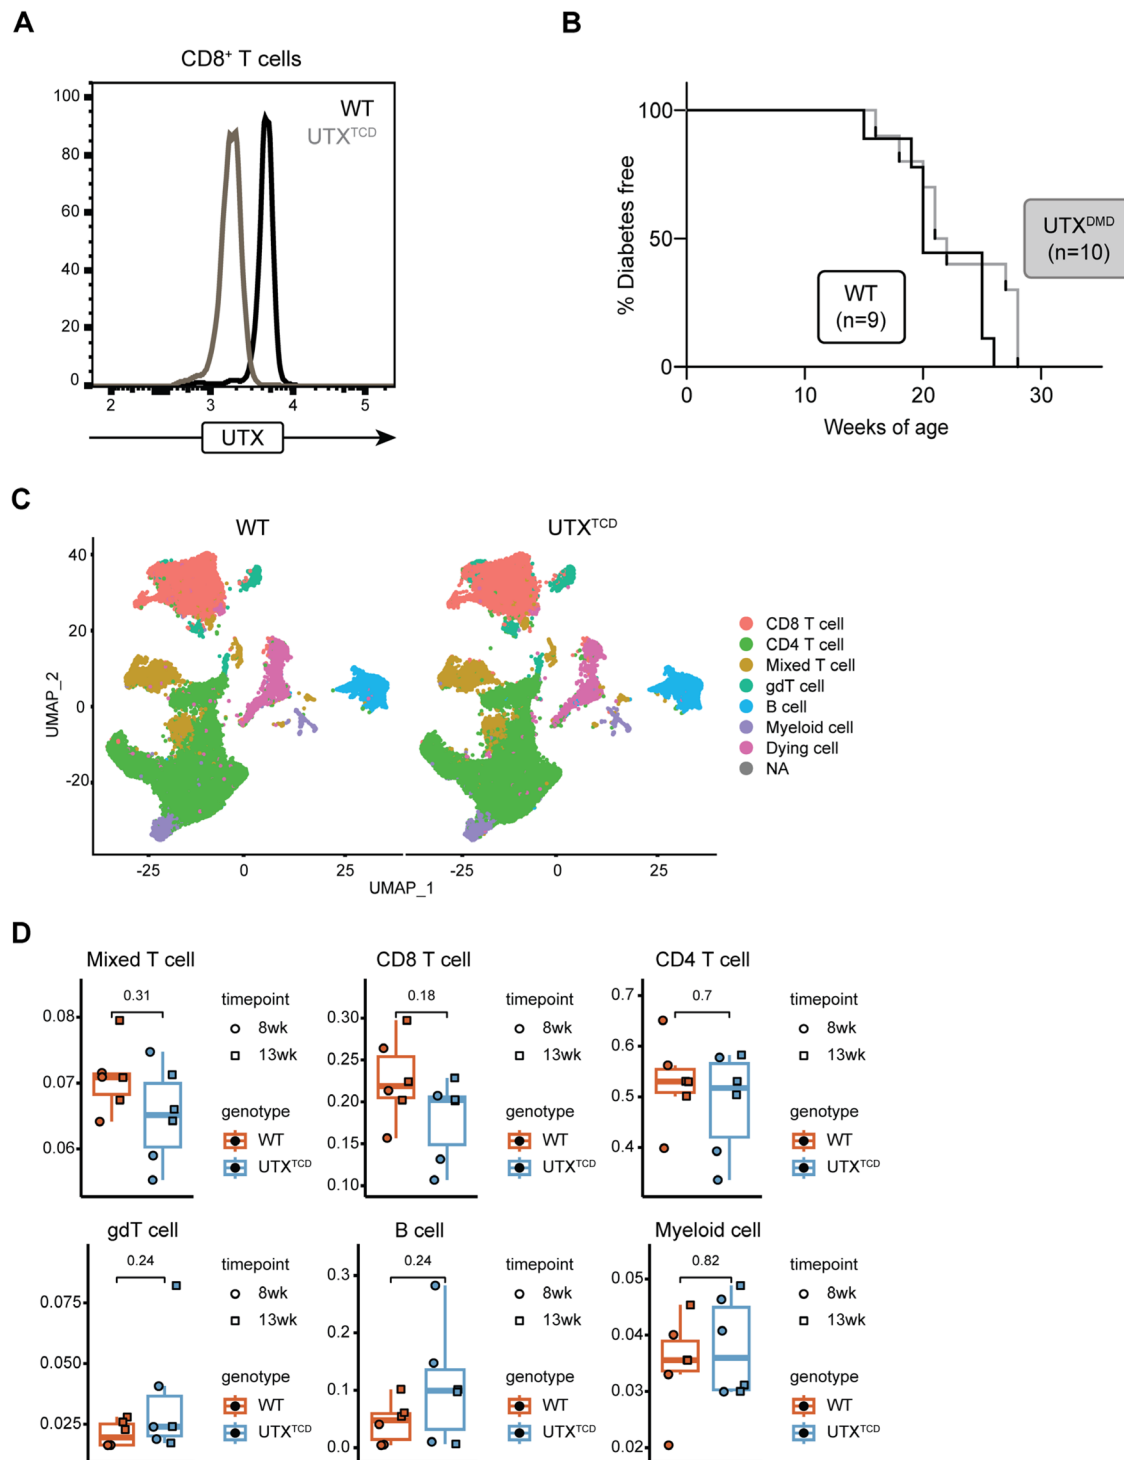

**Supplemental Figure 1. Single-cell RNA sequencing of CD45<sup>+</sup> cell populations in *NOD-UTX<sup>TCD</sup>* mice. (A) Flow cytometry analysis on the UTX protein level of WT and UTX<sup>TCD</sup> CD8<sup>+</sup> T cells. (B) Diabetes-free incidence curves of *NOD-UTX<sup>DMD</sup>* vs. *NOD-WT* female littermates. (C) Split UMAP of CD45<sup>+</sup> cells by genotype. (D) Comparison of subset frequencies of CD45<sup>+</sup> cell subsets. P values, two-sided, unpaired Mann-Whitney test.**

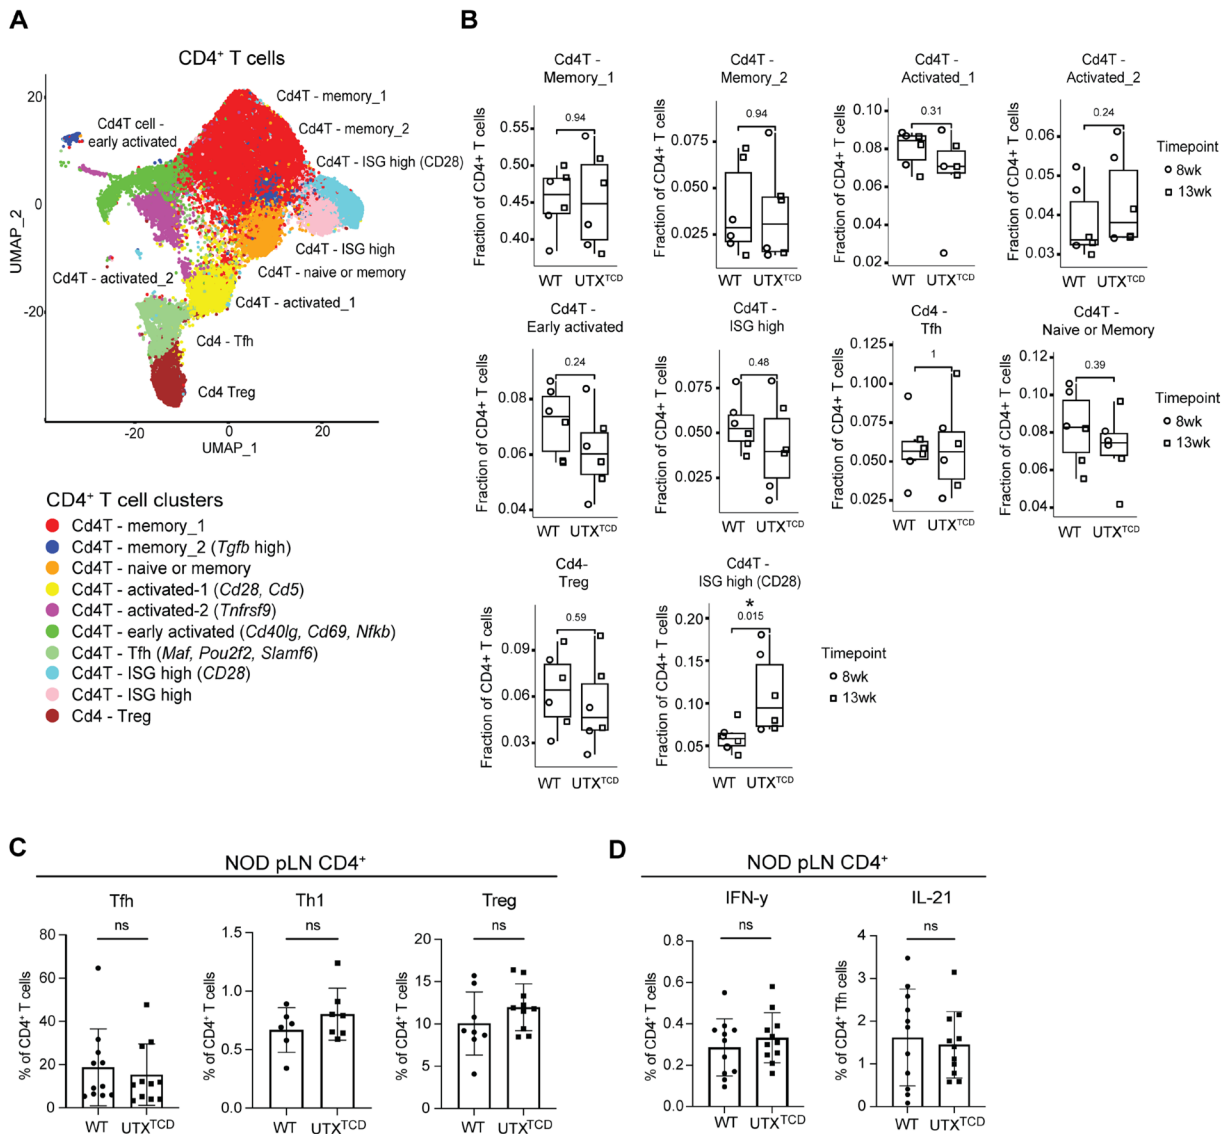

**Supplemental Figure 2. Minimal changes in CD4<sup>+</sup> T cells from *NOD-UTX<sup>TCD</sup>* mice. (A) UMAP of CD4<sup>+</sup> T cells. (B) Comparison of subset frequencies of CD4<sup>+</sup> T cell subsets. P values, two-sided, unpaired Mann-Whitney test. (C) Average frequencies of Tfh (CXCR5<sup>+</sup> PD1<sup>+</sup>), Th1 (T-bet<sup>+</sup>), and Treg (Foxp3<sup>+</sup>) cells among CD4<sup>+</sup> T cells in pLN of *NOD-WT* and *NOD-UTX<sup>TCD</sup>* female littermates. ns= not significant; unpaired Student's t-test. (D) Average frequencies of IFN- $\gamma$ <sup>+</sup> among CD4<sup>+</sup> T cells and IL-21<sup>+</sup> among CD4<sup>+</sup> Tfh cells in pLN of *NOD-WT* and *NOD-UTX<sup>TCD</sup>* female littermates. ns = not significant; unpaired Student's t-test.**

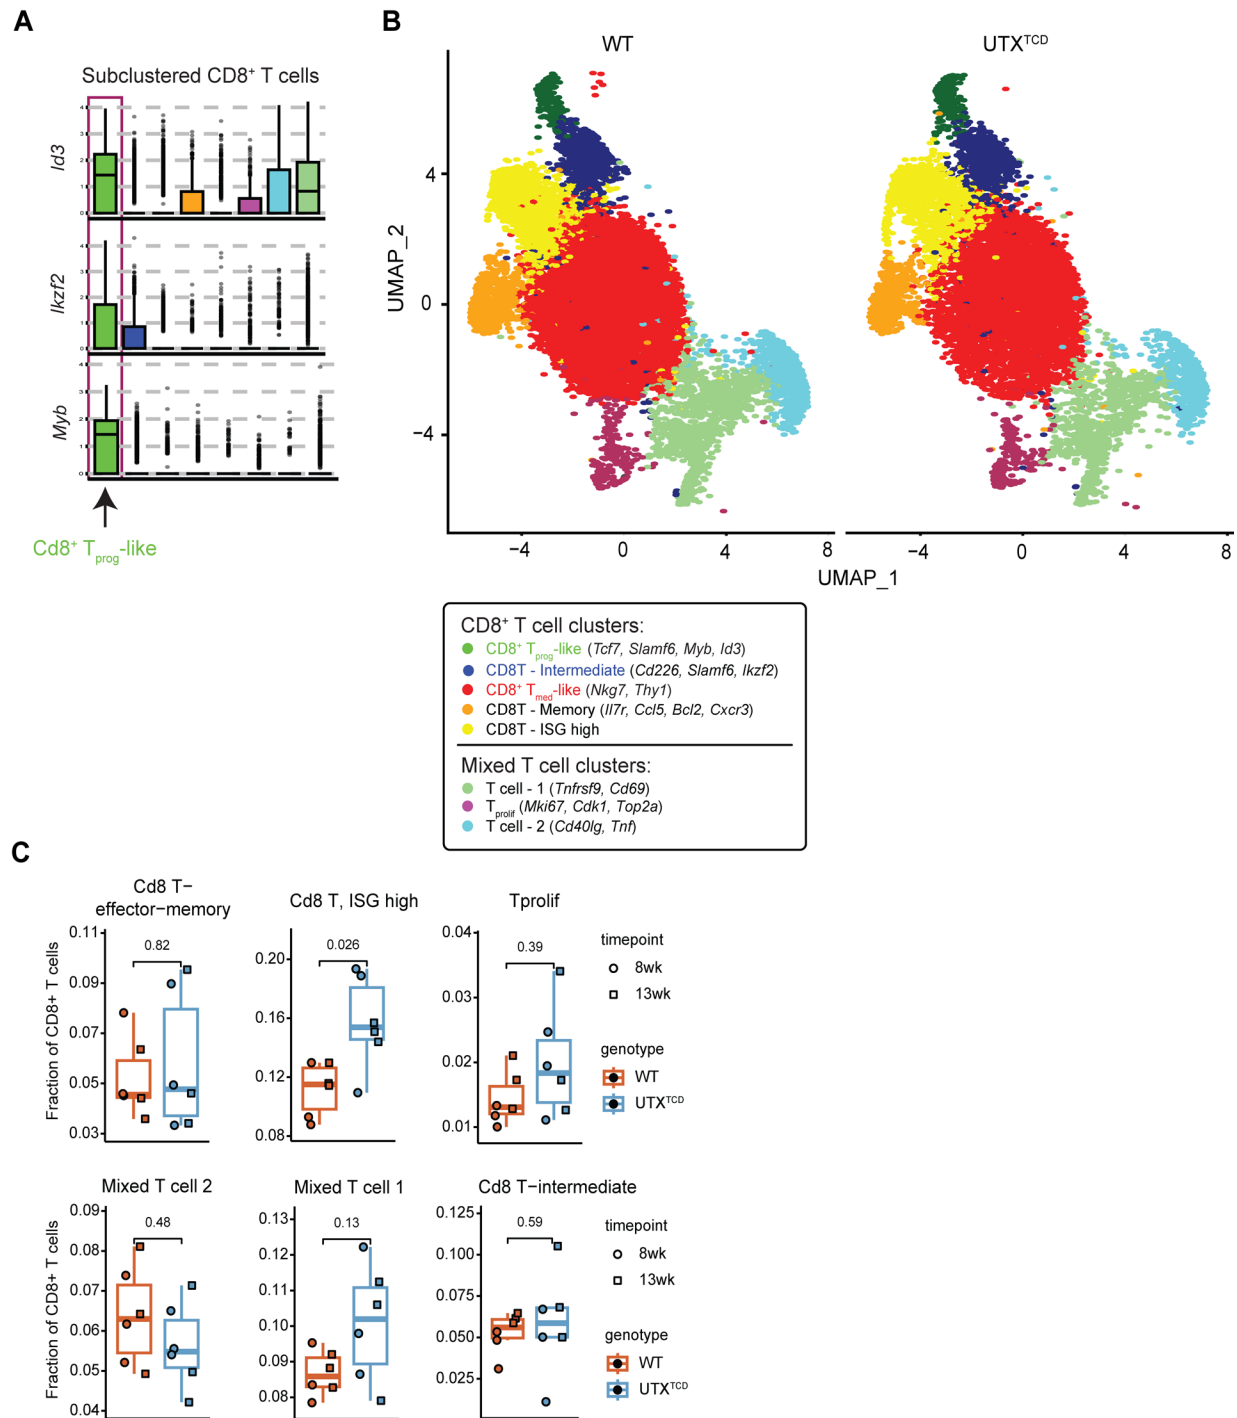

**Supplemental Figure 3. CD8<sup>+</sup> T cells from *NOD-UTX<sup>TCD</sup>* mice. (A) Expression of key genes (*Id3*, *Iklzf2*, and *Myb*) across CD8<sup>+</sup> T cell subclusters. (B) Split UMAP of CD8<sup>+</sup> T cells by genotype. (C) Comparison of subset frequencies of CD8<sup>+</sup> T cell subsets. Subset frequencies for “CD8 Tmed-like” and “CD8 Tprog-like” populations are shown in **Figure 1H**. P values, two-sided, unpaired Mann-Whitney test.**

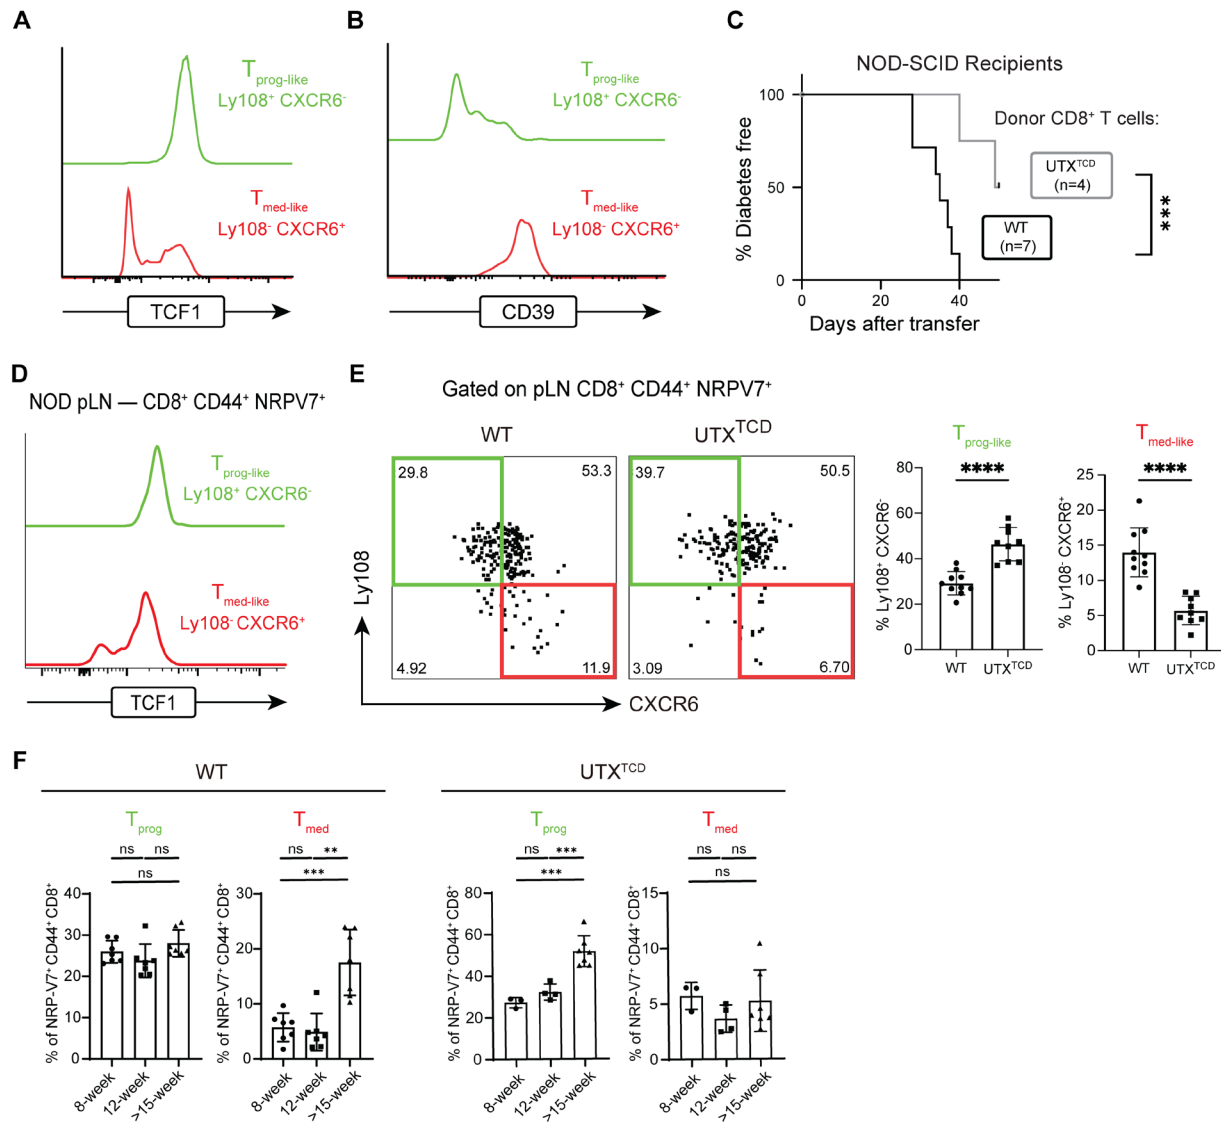

**Supplemental Figure 4. Altered CD8<sup>+</sup> T cell subset distribution in pLN of *NOD-UTX<sup>TCD</sup>* mice.** **(A)** Representative histogram of TCF1 (stem-like marker) and **(B)** CD39 (effector marker) expression in T<sub>prog</sub>-like vs. T<sub>med</sub>-like cell populations. **(C)** Diabetes incidence curves of *NOD-SCID* mice recipients transferred with WT CD4<sup>+</sup> T cells and either *NOD-WT* CD8<sup>+</sup> T cells or *NOD-UTX<sup>TCD</sup>* CD8<sup>+</sup> T cells. \*\*\**p*<0.001; Log rank test. **(D)** Representative histogram of TCF1 (stem-like marker) in T<sub>prog</sub>-like (Ly108<sup>+</sup> CD39<sup>-</sup>) vs. T<sub>med</sub>-like (Ly108<sup>-</sup> CD39<sup>+</sup>) in pancreatic lymph nodes. **(E)** Representative flow cytometric plot (left) and average frequencies (right) of T<sub>prog</sub>-like (Ly108<sup>+</sup> CXCR6<sup>-</sup>) and T<sub>med</sub>-like (Ly108<sup>-</sup> CXCR6<sup>+</sup>) cells within antigen-experienced, IGRP-specific pLN CD8<sup>+</sup> T cells (CD8<sup>+</sup> CD44<sup>+</sup> NRPV7<sup>+</sup>) of *NOD-WT* and *NOD-UTX<sup>TCD</sup>* female littermates (12-16 weeks of age). \*\*\**p*<0.001; Student's *t* test. **(F)** The frequency of IGRP<sup>+</sup> T<sub>prog</sub> (Ly108<sup>+</sup> CD39<sup>-</sup>) and T<sub>med</sub> (Ly108<sup>-</sup> CD39<sup>+</sup>) population in 8-week-old, 12-week-old, and over 15-week-old *NOD-WT* and *NOD-UTX<sup>TCD</sup>* female mice. \*\*\**p*<0.001; \*\**p*<0.01; unpaired two-way Mann Whitney test.

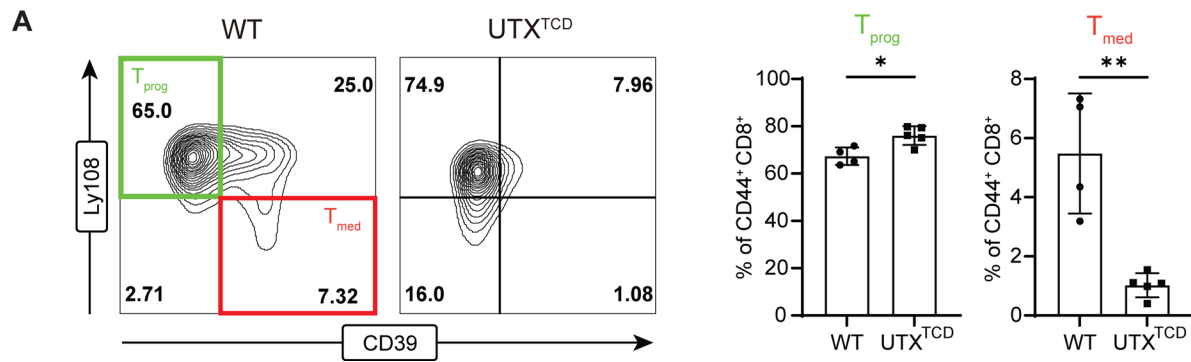

**Supplemental Figure 5. The phenotype of CD8<sup>+</sup> T cells in the pancreas of *NOD-TCR 8.3 UTX<sup>TCD</sup>* mice. (A) Representative flow plots (left) and frequencies (right) of T<sub>prog</sub> and T<sub>med</sub> in the pancreas of *NOD-TCR 8.3 WT* and *NOD-TCR 8.3 UTX<sup>TCD</sup>* mice. \*\*p<0.01; \*p<0.05; Student's t test.**

**A**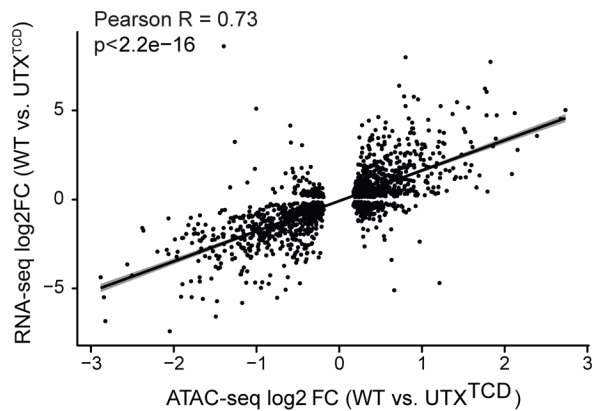**B**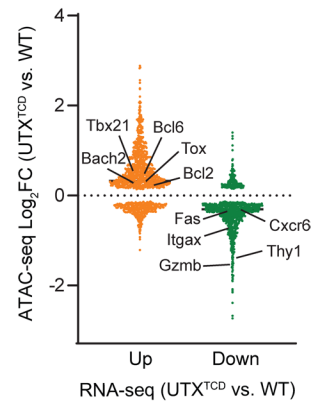

**Supplemental Figure 6. Analysis of ATAC-seq data and RNA-seq reveals differentially regulated genes.** **(A)** Correlation between the differential chromatin accessibility and differential gene expression values (in log<sub>2</sub>FC) in the CD8<sup>+</sup> T<sub>prog</sub> cells of *NOD-TCR 8.3 UTX<sup>TCD</sup>* compared to *NOD-TCR 8.3 WT* (difference in RNA expression, y-axis; difference in ATAC accessibility, x-axis). R, Pearson correlation coefficient. **(B)** Difference in chromatin accessibility of listed genes (in log<sub>2</sub>FC) between *NOD-TCR 8.3 UTX<sup>TCD</sup>* and *NOD-TCR 8.3 WT* CD8<sup>+</sup> T<sub>prog</sub> cells as measured by ATAC-seq (decreased accessibility in *NOD-TCR 8.3 UTX<sup>TCD</sup>*, log<sub>2</sub> FC < -0.5; increased in *NOD-TCR 8.3 UTX<sup>TCD</sup>*, log<sub>2</sub> FC > 0.5).

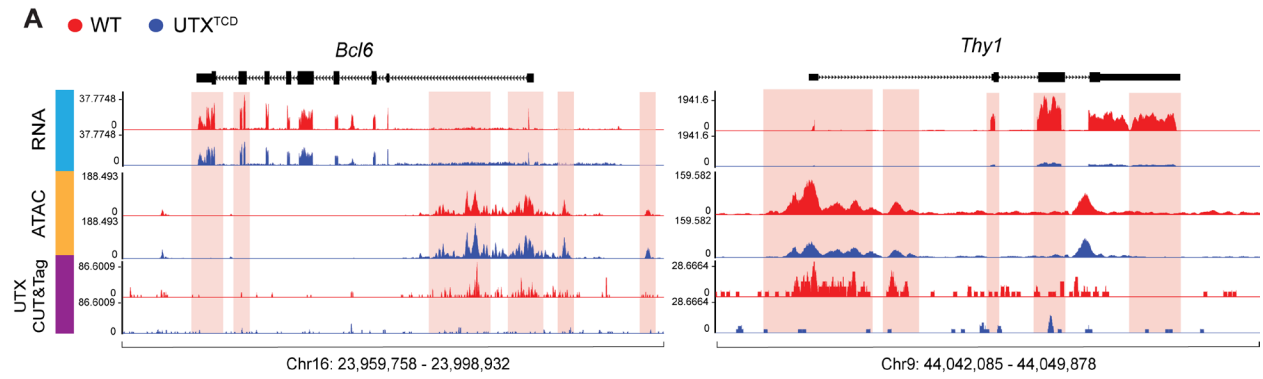

**Supplemental Figure 7. UTX deficiency alters chromatin accessibility, gene expression, and associated pathways. (A)** Representative gene tracks from UCSC Integrated Genome Browser of UTX CUT&Tag, ATAC-seq, and RNA-seq at *Bcl6*, and *Thy1* gene loci.

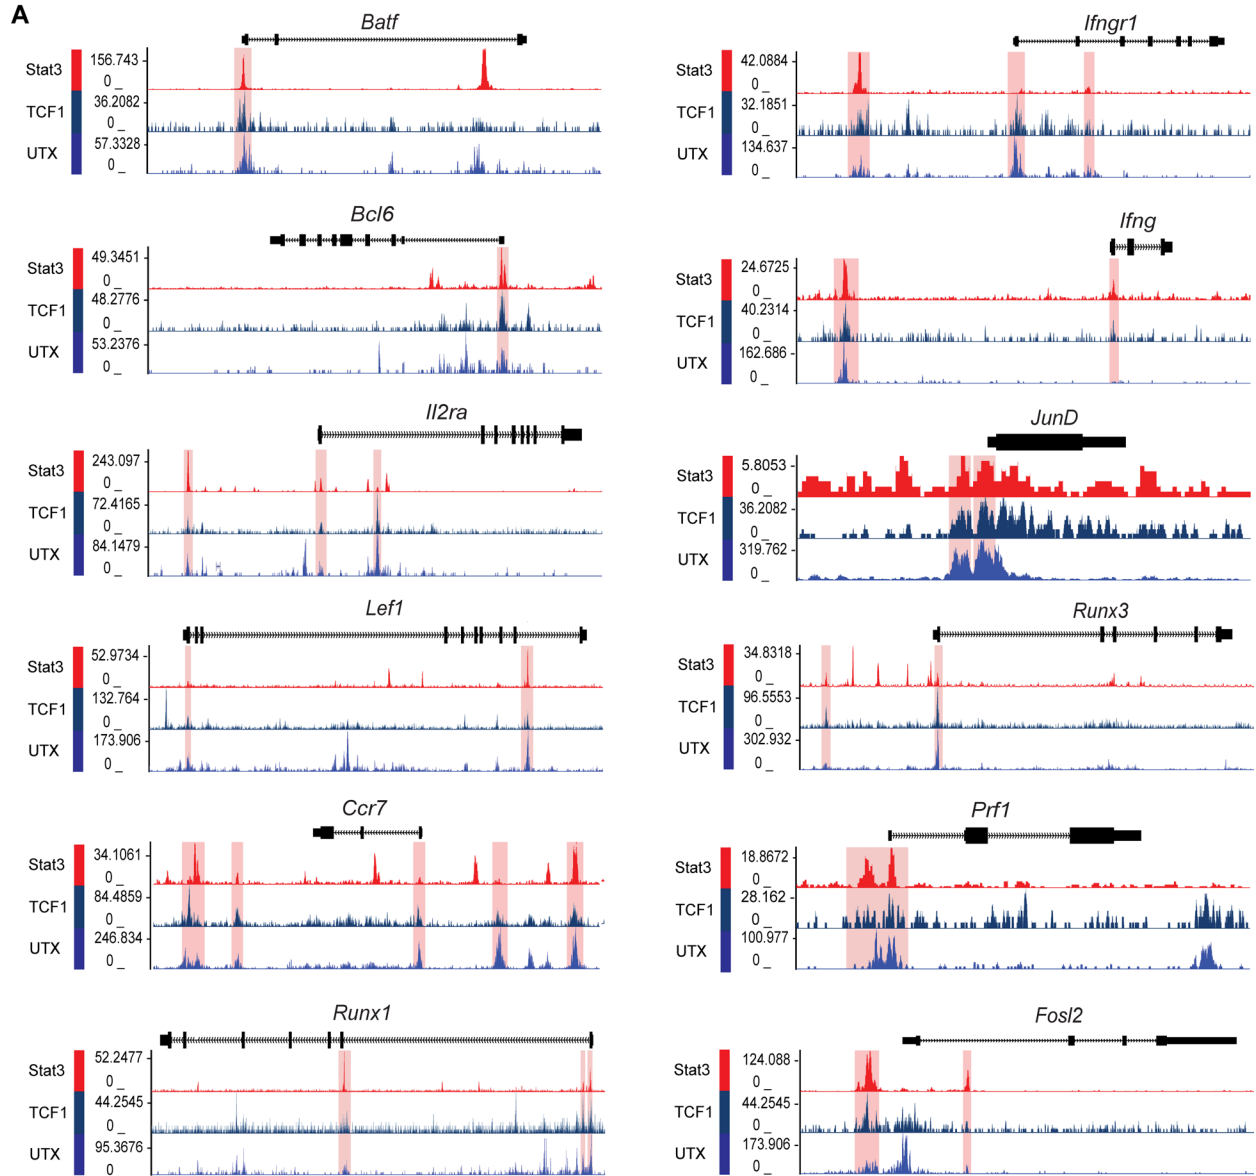

**Supplemental Figure 8. Co-occupancy of STAT3, TCF1, and UTX at progenitor and effector genes. (A)** Representative gene tracks from the UCSC genome browser to demonstrate the aligned region bound by UTX, TCF1, and Stat3 in progenitor genes (*Batf*, *Bcl6*, *Il2ra*, *Lef1*, *Ccr7*, and *Runx1*; left) and mediator genes (*Ifngr1*, *Ifng*, *JunD*, *Runx3*, *Prf1*, and *Fosl2*; right).

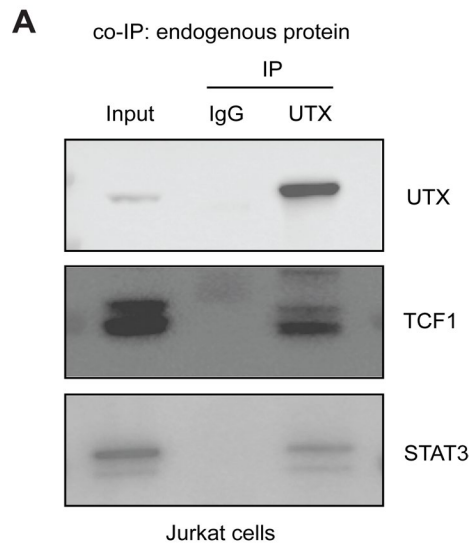

**Supplemental Figure 9. UTX interacts with TCF1 and STAT3 in Jurkat T cells. (A)** UTX co-immunoprecipitation (co-IP) of endogenous proteins from Jurkat cells. Immunoprecipitants were analyzed by immunoblotting for UTX, TCF1, and STAT3. Input and IgG pulldown controls are shown.

**Table S1. Antibodies used for flow cytometry and Western blot experiments.**

|                                                             |                             |                                     |
|-------------------------------------------------------------|-----------------------------|-------------------------------------|
| Brilliant Violet 711™ anti-mouse CD8a Antibody              | Biolegend                   | Cat# 100748;<br>RRID: AB_2562100    |
| APC anti-mouse Ly108 Antibody                               | Biolegend                   | Cat# 134610;<br>RRID: AB_2728155    |
| FITC anti-mouse CD186 (CXCR6) Antibody                      | Biolegend                   | Cat# 151108;<br>RRID: AB_2572145    |
| APC/Cyanine7 anti-mouse CD3 Antibody                        | Biolegend                   | Cat# 100222;<br>RRID: AB_2242784    |
| Alexa Fluor® 700 anti-mouse CD45 Antibody                   | Biolegend                   | Cat# 103128;<br>RRID: AB_493715     |
| PE/Dazzle™ 594 anti-mouse/human CD44 Antibody               | Biolegend                   | Cat# 103056;<br>RRID: AB_2564044    |
| BD Horizon™ BUV395 Rat Anti-Mouse CD39                      | BD<br>Biosciences           | Cat# 567264;<br>RRID: AB_2916524    |
| CD279 (PD-1) Monoclonal Antibody (J43), PE,<br>eBioscience™ | Thermo Fisher<br>Scientific | Cat# 12-9985-82;<br>RRID: AB_466295 |
| PE/Cyanine7 anti-mouse CD279 (PD-1) Antibody                | Biolegend                   | Cat# 109110;<br>RRID: AB_572017     |
| PE/Cyanine7 anti-mouse CD185 (CXCR5) Antibody               | Biolegend                   | Cat# 145516;<br>RRID: AB_2562210    |
| FITC anti-mouse CD185 (CXCR5) Antibody                      | Biolegend                   | Cat# 145520;<br>RRID: AB_2562866    |
| Brilliant Violet 605™ anti-mouse CD4 Antibody               | Biolegend                   | Cat# 100548;<br>RRID: AB_2563054    |

|                                                         |                           |                                      |
|---------------------------------------------------------|---------------------------|--------------------------------------|
| IL-21 Monoclonal Antibody (mhalx21), PE, eBioscience™   | Thermo Fisher Scientific  | Cat# 12-7213-82;<br>RRID: AB_1834465 |
| APC anti-mouse IFN-γ Antibody                           | Biolegend                 | Cat# 505810;<br>RRID: AB_315404      |
| PE anti-T-bet Antibody                                  | Biolegend                 | Cat# 644810;<br>RRID: AB_2200542     |
| FOXP3 Monoclonal Antibody (FJK-16s), FITC, eBioscience™ | Thermo Fisher Scientific  | Cat# 11-5773-82;<br>RRID: AB_465243  |
| Brilliant Violet 711™ anti-human CD8 Antibody           | Biolegend                 | Cat# 344734;<br>RRID: AB_2565243     |
| PE anti-human CD4 Antibody                              | Biolegend                 | Cat# 300550;<br>RRID: AB_2564152     |
| PE/Cyanine7 anti-human CD95 (Fas) Antibody              | Biolegend                 | Cat# 305622;<br>RRID: AB_2100369     |
| FITC anti-human CD45RA Antibody                         | Biolegend                 | Cat# 304148;<br>RRID: AB_2564157     |
| Brilliant Violet 605™ anti-human CD45RO Antibody        | Biolegend                 | Cat# 304238;<br>RRID: AB_2562153     |
| APC/Cyanine7 anti-human CD197 (CCR7) Antibody           | Biolegend                 | Cat# 353212;<br>RRID: AB_10916390    |
| TCF1/TCF7 (C63D9) Rabbit mAb (PE-Cy7® Conjugate)        | Cell Signaling Technology | Cat# 90511S;<br>RRID: AB_3086656     |
| TCF1/TCF7 (C63D9) Rabbit mAb (APC Conjugate)            | Cell Signaling Technology | Cat# 37636S;<br>RRID: AB_2922379     |

|                                                   |                              |                                     |
|---------------------------------------------------|------------------------------|-------------------------------------|
| KDM6A antibody [N2C1], Internal                   | GeneTex                      | Cat# GTX121246;<br>RRID:AB_10722382 |
| InVivoMAb anti-mouse PD-1 (CD279)                 | BioXCell                     | Cat# BE0146;<br>RRID:AB_10949053    |
| InVivoMAb mouse IgG2b isotype control             | BioXCell                     | Cat# BE0086;<br>RRID: AB_1107791    |
| Goat Anti-Rabbit IgG H&L (FITC)                   | abcam                        | Cat# ab6717;<br>RRID:AB_955238      |
| Tri-Methyl-Histone H3 (Lys27) (C36B11) Rabbit mAb | Cell Signaling<br>Technology | Cat# 9733S;<br>RRID:AB_2616029      |
| UTX (D3Q11) Rabbit mAb                            | Cell Signaling<br>Technology | Cat# 9733S;<br>RRID:AB_2721244      |
| DYKDDDDK Tag (D6W5B) Rabbit mAb                   | Cell Signaling<br>Technology | Cat# 9733S;<br>RRID:AB_2572291      |
| HA-Tag (C29F4) Rabbit mAb                         | Cell Signaling<br>Technology | Cat# 9733S;<br>RRID:AB_1549585      |
