# Supplementary material for: UTX coordinates TCF1 and STAT3 to control progenitor CD8+ T cell fate in autoimmune diabetes
Source: JCI journal article supplement (doi:10.1172/jci196325), 2025-12-16

# Full unedited gel for Figure 6

Figure 6C

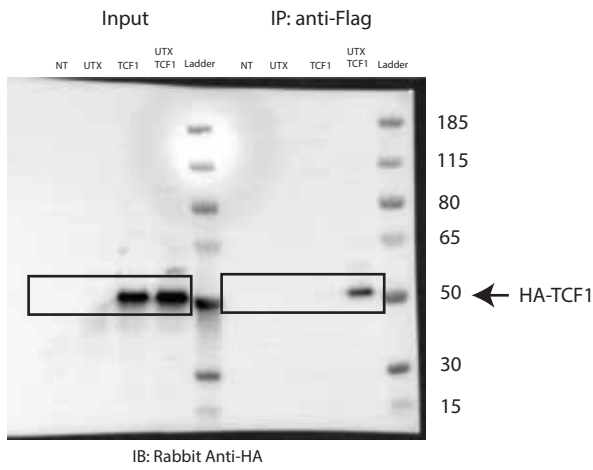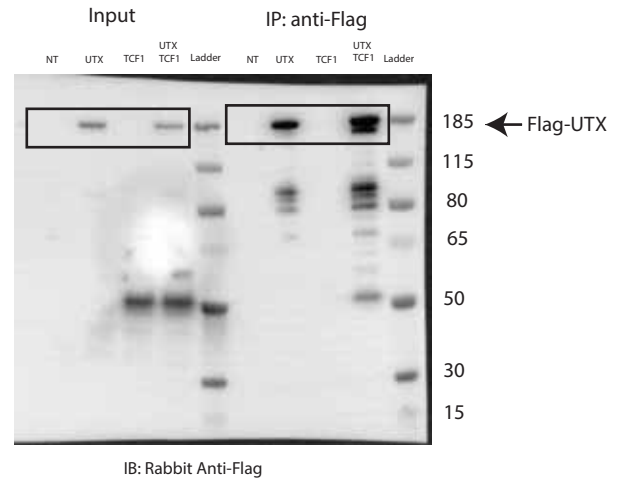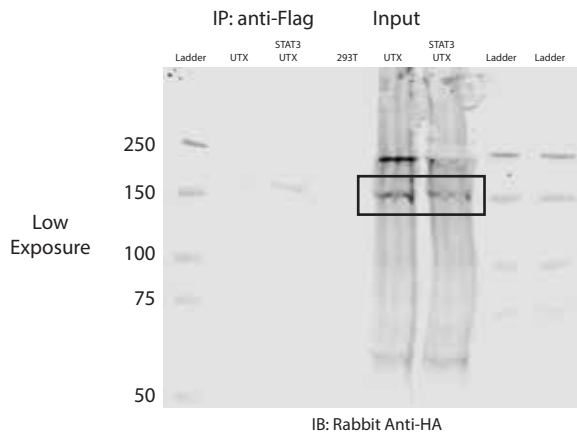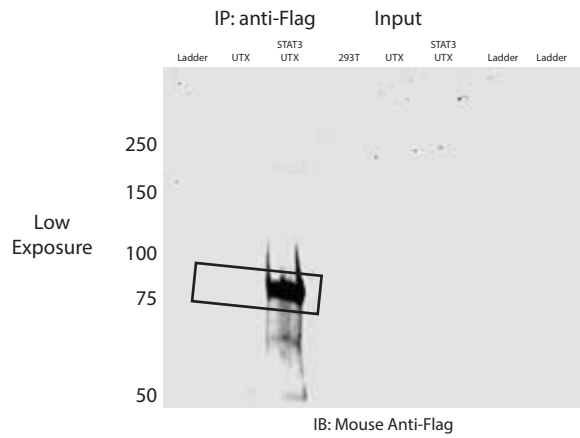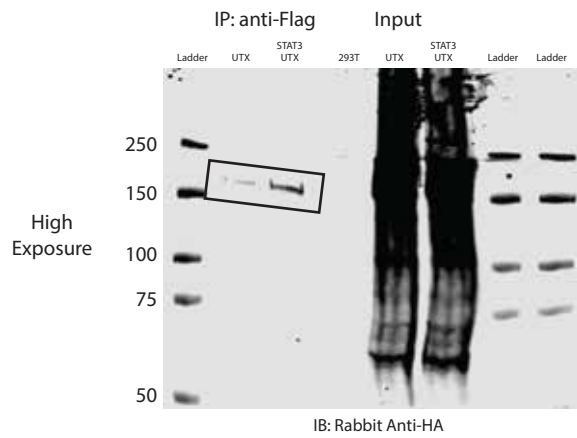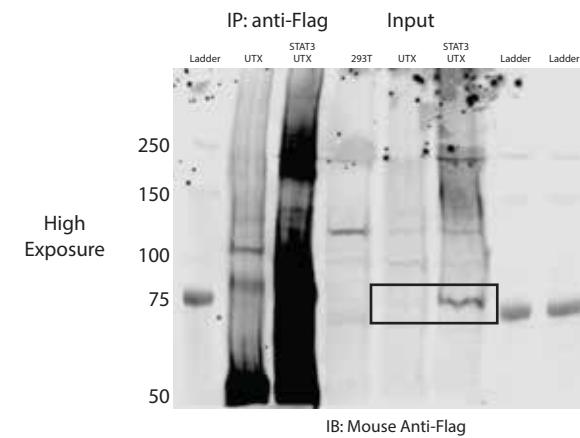

# Full unedited gel for Supplementary Figure 9

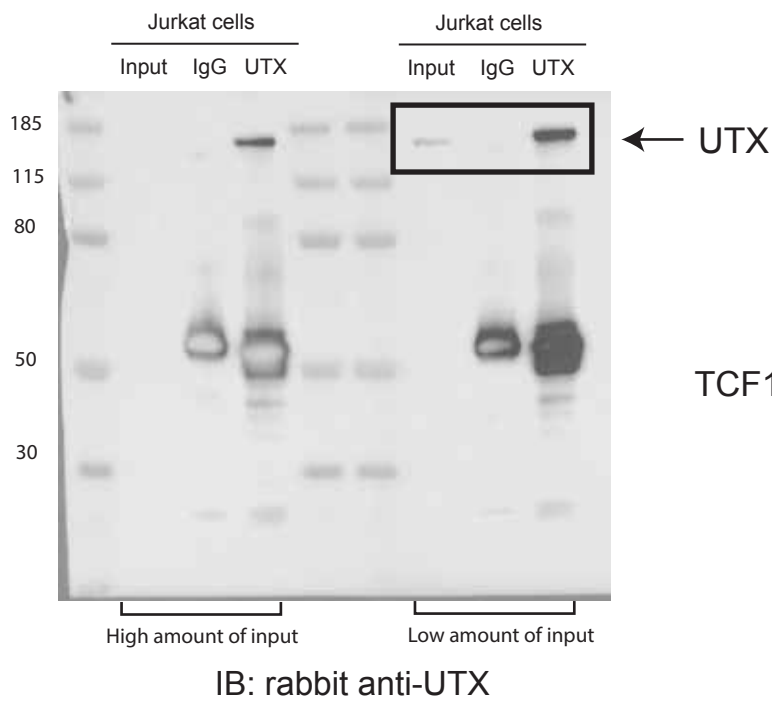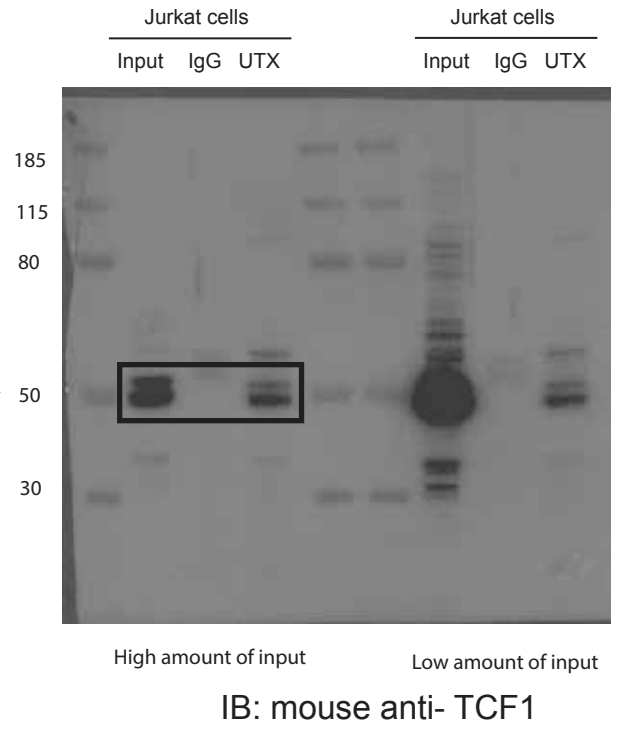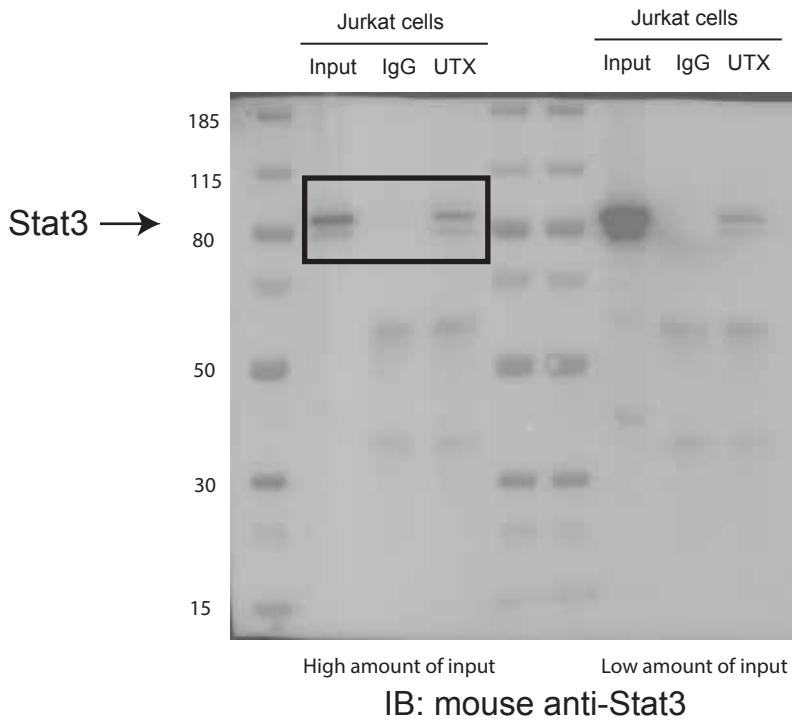

Supplement: sd7 [file 7]
